# Supplementary figures and images for: Direct upcycling of degraded NCM via low-temperature surface engineering for high performance lithium-ion batteries
Source: Royal Society of Chemistry journal article supplement (doi:10.1039/d5eb00018a), 2025-01-01

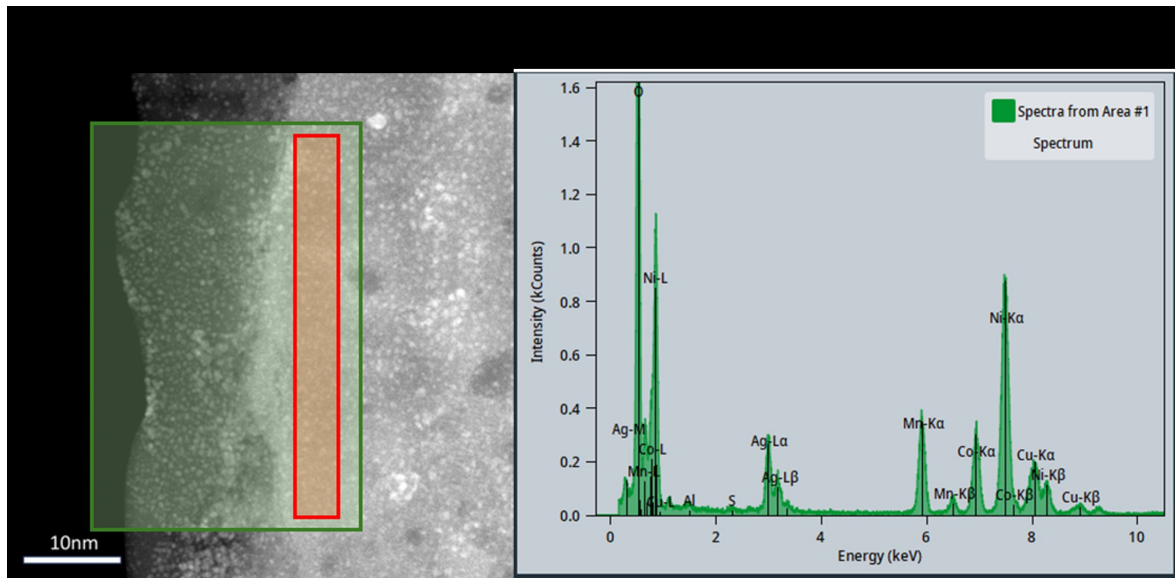

Supplement: d5eb00018a2.pdf [file d5eb00018a2.pdf]
